# Supplementary material for: Sociodemographic factors and use of pain medication are associated with health-related quality of life: results from an adult community mental health service in Norway
Source: Springer Nature journal article supplement (doi:10.1007/s11136-023-03461-7), 2023-06-20
Supplement: MOESM1 [file 25518720]

**Sociodemographic factors and use of pain medication are associated with health-related quality of life: results from an adult community mental health service in Norway**

Submitted to the journal *Quality of Life Research*

Martin Schevik Lindberg<sup>1,2</sup> , Martin Brattmyr<sup>1</sup> , Jakob Lundqvist<sup>1</sup> , Eirik Roos<sup>2</sup> ,  
Stian Solem<sup>1</sup> , Odin Hjemdal<sup>1</sup>  & Audun Havnen<sup>1,3</sup> 

Corresponding author:

Martin Schevik Lindberg

Norwegian University of Science and Technology

NTNU, Department of Psychology, NO-7491, Trondheim, Norway

[martin.s.lindberg@ntnu.no](mailto:martin.s.lindberg@ntnu.no)

**Supplemental Table 1.** Distribution of EQ-5D scores for women by age groups.

| EQ-5D-5L dimensions           | Proportion of responses in every dimension |       |       |       |      | All women<br>% |
|-------------------------------|--------------------------------------------|-------|-------|-------|------|----------------|
|                               | 18-29                                      | 30-39 | 40-49 | 50-59 | >=60 |                |
|                               | %                                          | %     | %     | %     | %    |                |
| <b>Mobility</b>               |                                            |       |       |       |      |                |
| No problems                   | 55.3                                       | 62.0  | 61.2  | 56.5  | 51.1 | 58.1           |
| Slight problems               | 27.3                                       | 24.0  | 23.3  | 21.2  | 20.0 | 24.6           |
| Moderate problems             | 14.3                                       | 9.2   | 12.4  | 14.1  | 20.0 | 12.9           |
| Severe problems               | 3.1                                        | 4.8   | 3.1   | 7.1   | 6.7  | 4.1            |
| Unable to do                  | 0.0                                        | 0.0   | 0.0   | 1.1   | 2.2  | 0.3            |
| Proportion reporting problems | 44.7                                       | 38.0  | 38.8  | 43.5  | 48.9 | 41.9           |
| <b>Self-care</b>              |                                            |       |       |       |      |                |
| No problems                   | 74.8                                       | 83.3  | 79.7  | 81.2  | 82.6 | 79.2           |
| Slight problems               | 18.3                                       | 12.3  | 13.3  | 14.1  | 15.2 | 15.1           |
| Moderate problems             | 5.4                                        | 3.1   | 3.9   | 3.5   | 2.2  | 4.1            |
| Severe problems               | 1.5                                        | 0.9   | 3.1   | 1.2   | 82.6 | 1.5            |
| Unable to do                  | 0.0                                        | 0.4   | 0.0   | 0.0   | 15.2 | 0.1            |
| Proportion reporting problems | 25.2                                       | 16.7  | 20.3  | 18.8  | 17.4 | 20.8           |
| <b>Usual activities</b>       |                                            |       |       |       |      |                |
| No problems                   | 18.3                                       | 21.0  | 17.2  | 30.6  | 33.3 | 21.0           |
| Slight problems               | 41.9                                       | 44.1  | 46.1  | 34.1  | 31.1 | 41.6           |
| Moderate problems             | 25.8                                       | 24.9  | 24.2  | 20.0  | 20.0 | 24.5           |
| Severe problems               | 13.4                                       | 10.0  | 11.7  | 12.9  | 15.6 | 12.3           |
| Unable to do                  | 0.6                                        | 0.0   | 0.8   | 2.4   | 0.0  | 0.6            |
| Proportion reporting problems | 81.7                                       | 79.0  | 82.8  | 69.4  | 66.7 | 79.1           |
| <b>Pain/discomfort</b>        |                                            |       |       |       |      |                |
| No problems                   | 22.6                                       | 18.3  | 16.5  | 10.6  | 13.1 | 18.6           |
| Slight problems               | 39.3                                       | 46.3  | 36.7  | 43.5  | 23.9 | 40.6           |
| Moderate problems             | 26.9                                       | 24.9  | 29.7  | 27.1  | 34.8 | 27.1           |
| Severe problems               | 8.7                                        | 10.0  | 14.8  | 16.5  | 15.2 | 11.2           |
| Extreme                       | 2.5                                        | 0.5   | 2.3   | 2.3   | 13.0 | 2.5            |
| Proportion reporting problems | 77.4                                       | 81.7  | 83.5  | 89.4  | 86.9 | 81.4           |
| <b>Anxiety/depression</b>     |                                            |       |       |       |      |                |
| No problems                   | 9.3                                        | 12.2  | 12.5  | 16.7  | 4.4  | 11.2           |
| Slight problems               | 24.5                                       | 32.8  | 31.5  | 29.7  | 28.9 | 28.7           |
| Moderate problems             | 35.7                                       | 34.0  | 38.6  | 28.5  | 20.0 | 34.2           |
| Severe problems               | 25.5                                       | 17.5  | 15.8  | 19.1  | 40.0 | 21.7           |
| Extreme                       | 5.0                                        | 3.5   | 1.6   | 6.0   | 6.7  | 4.2            |
| Proportion reporting problems | 90.7                                       | 87.8  | 87.5  | 83.3  | 95.6 | 88.8           |

**Supplemental Table 2.** Distribution of EQ-5D scores for men by age groups.

| EQ-5D-5L dimensions           | Proportion of responses in every dimension |       |       |       |       | All men<br>% |
|-------------------------------|--------------------------------------------|-------|-------|-------|-------|--------------|
|                               | 18-29                                      | 30-39 | 40-49 | 50-59 | >=60  |              |
|                               | %                                          | %     | %     | %     | %     |              |
| <b>Mobility</b>               |                                            |       |       |       |       |              |
| No problems                   | 62.2                                       | 61.2  | 61.8  | 57.5  | 57.9  | 61.4         |
| Slight problems               | 22.4                                       | 21.6  | 16.2  | 21.3  | 21.0  | 20.8         |
| Moderate problems             | 10.5                                       | 13.4  | 13.2  | 14.9  | 5.3   | 12.1         |
| Severe problems               | 4.2                                        | 2.2   | 5.9   | 4.2   | 5.3   | 3.9          |
| Unable to do                  | 0.7                                        | 1.6   | 2.9   | 2.1   | 10.5  | 1.9          |
| Proportion reporting problems | 37.8                                       | 38.8  | 38.2  | 42.5  | 42.1  | 38.6         |
| <b>Self-care</b>              |                                            |       |       |       |       |              |
| No problems                   | 77.5                                       | 83.5  | 72.1  | 85.1  | 79.0  | 79.6         |
| Slight problems               | 15.5                                       | 12.0  | 17.6  | 4.3   | 15.8  | 13.4         |
| Moderate problems             | 4.2                                        | 4.5   | 8.8   | 8.5   | 0.0   | 5.3          |
| Severe problems               | 2.8                                        | 0.0   | 1.5   | 2.1   | 5.2   | 1.5          |
| Unable to do                  | 0.0                                        | 0.0   | 0.0   | 0.0   | 0.0   | 0.2          |
| Proportion reporting problems | 22.5                                       | 16.5  | 27.9  | 14.9  | 21.0  | 20.4         |
| <b>Usual activities</b>       |                                            |       |       |       |       |              |
| No problems                   | 24.5                                       | 19.6  | 26.5  | 25.5  | 31.6  | 23.7         |
| Slight problems               | 30.8                                       | 39.1  | 26.5  | 27.7  | 31.6  | 32.7         |
| Moderate problems             | 34.3                                       | 21.8  | 26.5  | 34.0  | 21.0  | 28.1         |
| Severe problems               | 9.7                                        | 16.5  | 17.7  | 10.6  | 15.8  | 13.5         |
| Unable to do                  | 0.7                                        | 3.0   | 3.0   | 2.2   | 0.0   | 2.0          |
| Proportion reporting problems | 75.5                                       | 80.4  | 73.5  | 74.5  | 68.4  | 76.3         |
| <b>Pain/discomfort</b>        |                                            |       |       |       |       |              |
| No problems                   | 29.6                                       | 26.3  | 17.7  | 21.3  | 21.0  | 25.5         |
| Slight problems               | 43.7                                       | 45.9  | 51.4  | 38.3  | 26.3  | 43.9         |
| Moderate problems             | 21.1                                       | 19.6  | 19.1  | 21.3  | 31.6  | 20.6         |
| Severe problems               | 4.2                                        | 6.8   | 7.4   | 17.0  | 5.3   | 7.3          |
| Extreme                       | 1.4                                        | 1.4   | 4.4   | 2.1   | 15.8  | 2.7          |
| Proportion reporting problems | 70.4                                       | 73.6  | 82.3  | 78.7  | 79.0  | 74.5         |
| <b>Anxiety/depression</b>     |                                            |       |       |       |       |              |
| No problems                   | 6.3                                        | 10.5  | 13.2  | 2.1   | 0.0   | 8.3          |
| Slight problems               | 27.5                                       | 19.6  | 30.9  | 31.9  | 16.7  | 25.3         |
| Moderate problems             | 31.0                                       | 39.9  | 33.8  | 40.4  | 55.6  | 36.5         |
| Severe problems               | 28.2                                       | 23.3  | 14.7  | 23.4  | 22.2  | 23.6         |
| Extreme                       | 7.0                                        | 6.7   | 7.4   | 2.2   | 5.5   | 6.3          |
| Proportion reporting problems | 93.7                                       | 89.5  | 86.8  | 97.9  | 100.0 | 91.7         |
